# Supplementary material for: Anesthetic effects and body weight changes associated with ketamine-xylazine-lidocaine administered to CD-1 mice
Source: PLoS One. 2017 Sep 14;12(9):e0184911. doi: 10.1371/journal.pone.0184911 (PMC5599034; doi:10.1371/journal.pone.0184911)
Supplement: S1 File — Raw data of mice after intraperitioneal injection with ketamine/xylazine ± lidocaine. (XLSX) [file pone.0184911.s001.xlsx]

## Sheet: Body weights
															BODY WEIGHT (G), DAYS POST INJECTION												INJ DAY
	Treatment	Cage	Tail ID	#	-23	-22	-21	-20	-19	-18	-17	-16	-15	-14	-13	-12	-11	-10	-9	-8	-7	-6	-5	-4	-3	-2	0	2	11
	Control (Saline)	A	I	1																			34.7				38.3	39.7
			II	2																							30.8	31.9	34.5
			III	3																			32.8			35.6	34.9	36.2
			IIII	4																							29.6	31.2	33.2
	Ketamine + Xylazine	B	I	5																			29.6				33.6	32.1
			II	6												29.7					31.7	31.6	32.2	32.7	33.3	33.7	34.8	34.2	37
			III	7												28.4					29.9	29.5	30.1	29.8	30	30	30.8	30.8	32.1
			IIII	8												25.7					27.3	27	28.1	28.02	28.4	28.6	29.7	29.7	30.5
		C	I	9																		30.6					34.4	34.4
			II	10		31					32.7	32.8	34.5	35.3	35.6	35.57		36.6	36.9	36.8	38.02	37.95			38.46	39.38	39.3	38.25	39.24
			III	11		29					31.1	31.9	33	33.4	34.1	34.5		35.4	35.79	36.3	36.8	37.05			38	38.5	38.61	38.1	39.29
			IIII	12		31.3					32.2	33.5	34.8	34.5	35.1	35.07		35.3	36.02	35.9	36.7	36.65			37	39.3	38.1	37.19	37.48
	Ketamine + Xylazine + Lidocaine 4mg/kg	D	I	13										30.1					32.2	32.5	32.9	32.9	33.4	33.7		34.2	35.5	35.47
			II	14																						29.6	31	30.7	33.4
			III	15																						30.1	31.5	30.7	34.3
			IIII	16																			29.2				31	31.7	34.98
		E	I	17										30.8					32.7	33.1	33.9	35	35.6	35.74		37.2	37.7	38.19
			II	18																						30	30.7	30.1	33.6
			III	19	29.6			30.9		30.8	31	32.3	32.5	32.1	32.86		33.7	33.6	34.85	35.31	35.51			35.91	36.5	37.96	38.3	37.3	38.71
			IIII	20	31.4			33.2		33.5	34.1	35.4	35.5	36	36.5		37.1	37.8	38.3	40	39.83			40.04	39.95	40.58	40.6	40.11	42.43
	Ketamine + Xylazine + Lidocaine 8mg/kg	F	I	21																		28.3					31.5	30.3
			II	22																32.7					33.7	34.7	36.1	35.5	37.63
			III	23																28.8					29.3	29.7	31.2	30.66	34.1
			IIII	24																29.6					29.8	30.7	32.1	31.57	34.28
		G	I	25																		28.2					30.5	30.07
			II	26															29.1					29.6	30.4	30.9	31.4	31.16	34.4
			III	27															27.6					29.6	29.7	31.5	32.2	32.17	34.2
			IIII	28															29.6					31.4	32.8	33.3	34	34.4	36.7
	Ketamine + Xylazine + Lidocaine 16mg/kg	H	I	29																	30.74		33.39	34.36	34.24	35.81	37.26	37.85
			II	30																					32.67	32.98	34.01	32.67	37.93
			III	31																					29.01	29.93	31.51	31.53	36.25
			IIII	32																					29.72	30.52	32.12	31.16	35.1
		I	I	33																	27.35		28.62	28.11	27.61	28.34	29.8	29.35
			II	34																				30.32		31.44	33.31	32.8	36.8
			III	35																				27.68		28.13	29.36	29.38	33
			IIII	36																				27.62		28.92	28.97	29.61	32.66

## Sheet: Body wt changes
	Treatment	Cage	Tail ID	#	Wt change in 48 hrs prior to inj (g)				% Wt Change prior to inj	Wt change in 48 hrs post-inj (g)	% Wt change post inj		Avg pre	Avg post		Avg pre	Avg post										Avg pre	Avg post
	Control (Saline)	A	I	1	1.44				3.90667	1.4	3.65535		3.18518	4.08928	Saline	3.19	4.08928									Saline	1.0425	1.35
			II	2	1.2				4.05405	1.1	3.57143				KX	2.81	-1.57105									KX	0.91875	-0.57125
			III	3	0.84				2.46	1.3	3.72493				KXL4	2.85	-0.50125									KXL4	0.92625	-0.1775
			IIII	4	0.69				2.32	1.6	5.40541				KXL8	3.21	-1.28									KXL8	1.005	-0.41
	Ketamine + Xylazine	B	I	5	1.6				5	-1.5	-4.46429		2.81461	-1.57105	KXL16	4.3	-0.89									KXL16	1.29	-0.29
			II	6	1.1				3.26409	-0.6	-1.72414
			III	7	0.8				2.66667	0	0
			IIII	8	1.1				3.84615	0	0
		C	I	9	1.3				3.93	0	0
			II	10	0.45				1.16	-1.05	-2.67
			III	11	0.52				1.37	-0.51	-1.32
			IIII	12	0.48				1.28	-0.91	-2.39
	Ketamine + Xylazine + Lidocaine 4mg/kg	D	I	13	0.87				2.51	-0.03	-0.08		2.85	-0.50125
			II	14	1.4				4.73	-0.05	-0.16
			III	15	1.4				4.65	-0.7	-2.22
			IIII	16	0.72				2.38	0.7	2.26
		E	I	17	0.84				2.28	0.49	1.3
			II	18	0.7				2.33	-0.6	-1.95
			III	19	1.2				3.23	-0.89	-2.32
			IIII	20	0.28				0.69	-0.34	-0.84
	Ketamine + Xylazine + Lidocaine 8mg/kg	F	I	21	1.07				3.52	-1.2	-3.81		3.21125	-1.28
			II	22	1.4				4.03	-0.6	-1.66
			III	23	1.5				5.05	-0.54	-1.73
			IIII	24	1.4				4.56	-0.53	-1.65
		G	I	25	0.77				2.59	-0.43	-1.41
			II	26	0.5				1.62	-0.07	-0.22
			III	27	0.7				2.22	-0.16	-0.5
			IIII	28	0.7				2.1	0.25	0.74
	Ketamine + Xylazine + Lidocaine 16mg/kg	H	I	29	1.45				4.05	0.59	1.58		4.295	-0.88875
			II	30	1.03				3.12	-1.34	-3.94
			III	31	1.58				5.28	0.02	0.06
			IIII	32	1.6				5.24	-0.96	-2.99
		I	I	33	1.46				5.15	-0.45	-1.51
			II	34	1.66				5.95	-0.51	-1.53
			III	35	1.23				4.37	0.02	0.07
			IIII	36	0.34				1.2	0.33	1.15

## Sheet: Times to righting loss-returns
		Minutes:sec
										SECONDS
	Times to LRR:	n	KX	KXL4	KXL8	KXL16			n	KX	KXL4	KXL8	KXL16
		1	00:01:47	00:01:28	00:01:28	00:01:17			1	107	88	88	77
		2	00:04:58	00:01:41	00:01:41	00:01:16			2	298	101	101	76
		3	00:02:00	00:01:41	00:01:44	00:01:27			3	120	101	104	87
		4	00:01:41	00:01:25	00:01:37	00:01:21			4	101	85	97	81
		5	00:01:46	00:01:36	00:01:52	00:01:12			5	106	96	112	72
		6	00:01:48	00:01:41	00:02:21	00:01:02			6	108	101	141	62
		7	00:01:31	00:02:00	00:01:34	00:01:44			7	91	120	94	104
		8	00:02:17	00:02:42	00:01:52	00:01:19			8	137	162	112	79
		Median	00:01:47.500000	00:01:41	00:01:42.500000	00:01:18			Median	107.5	101	102.5	78
	Times to Regain RR:	n	KX	KXL4	KXL8	KXL16			n	KX	KXL4	KXL8	KXL16
		1	00:46:23	00:38:37	00:32:12	00:36:50			1	2783	2317	1932	2210
		2	01:06:44	00:30:50	00:44:23	00:46:43			2	4004	1850	2663	2803
		3	00:36:01	00:52:09	00:42:32	00:41:51			3	2161	3129	2552	2511
		4	00:45:02	00:37:30	00:37:08	00:49:01			4	2702	2250	2228	2941
		5	00:42:47	01:06:10	00:54:14	00:36:41			5	2567	3970	3254	2201
		6	00:59:05	00:54:46	00:38:47	00:45:43			6	3545	3286	2327	2743
		7	01:01:42	01:07:40	00:43:06	00:40:46			7	3702	4060	2586	2446
		8	00:48:00	00:57:36	00:34:27	00:41:32			8	2880	3456	2067	2492
		Median	00:47:11.500000	00:53:27.500000	00:40:39.500000	00:41:41.500000			Median	2831.5	3207.5	2439.5	2501.5

## Sheet: Minutes immobilized
No. of whole minutes immobilized:
=total minutes that mice were fully relaxed, without muscle tone or movement
	n	KX	KXL4	KXL8	KXL16
	1	39	31	27	31
	2	53	26	36	38
	3	30	41	37	30
	4	38	27	21	37
	5	33	47	45	31
	6	43	47	22	38
	7	44	40	25	28
	8	30	46	26	33
	Median	38.5	40.5	26.5	32

## Sheet: Toe pinch
Total count of absent toe pinch during immobilization:
=number of minutes within the period of immobilization that toe pinch was absolutely absent
	n	KX	KXL4	KXL8	KXL16
	1	0	0	1	11				1	11
	2	0	0	13	30				13	30
	3	0	6	17	0			6	17
	4	0	1	0	26			1		26
	5	0	13	9	13			13	9	13
	6	0	10	0	20			10		20
	7	9	2	0	0		9	2
	8	0	0	0	13					13
	avg	1.125	4	5	14.125		9	6	11	16.5
Total minutes potential surgical plane during immobilization:
=number of minutes within the period of immobilization that toe pinch was equivocal and/or absent
Equivocal = unconscious twitch vs. actual withdrawal of limb, or barely detectable, or required multiple attempts to elicit movement	n	KX	KXL4	KXL8	KXL16
	1	0	3	1	14
	2	2	0	15	30
	3	0	9	23	2
	4	1	3	1	29
	5	1	15	12	18
	6	2	12	6	22
	7	11	7	3	0
	8	0	4	0	15
	avg	2.125	6.625	7.625	16.25
